# Supplementary material for: Anti-HCV treatment with ombitasvir/paritaprevir/ritonavir ± dasabuvir is associated with increased bile acid levels and pruritus
Source: Springer Nature journal article supplement (doi:10.1007/s00508-017-1268-x), 2017-10-04
Supplement: MOESM1 [file 15110222]

Supplemental table 1. Serum levels of total bile acids, bilirubin and cholestasis markers before and during OBV/PTV/r+/-DSV treatment (n=20)

|  | **Week 0** | **Week 4** | **p** |
| --- | --- | --- | --- |
| **TBA (µmol/l)** | 3.6 (1.6, 9.4) | 15.1 (5.1, 52.4)* | <0.001 |
| **Bilirubin (mg/dl)** | 0.8 ± 0.4 | 1.2 ± 0.8 | 0.006 |
| **GGT (U/l)** | 102 (66, 132) | 39 (26, 58) | <0.001 |
| **AP (U/l)** | 71 (55, 89) | 68 (57, 82) | 0.717 |

TBA, total bile acids; GGT, gamma-glutamyltransferase; AP, alkaline phosphatase

* For patient #1, TBA value at day 3 (before start of cholestyramine) was entered

Supplemental table 2. Serum levels of total bile acids, bilirubin and cholestasis markers before and during OBV/PTV/r+/-DSV treatment in patients who reported pruritus (n=5)

|  | **Week 0** | **Week 4** | **p** |
| --- | --- | --- | --- |
| **TBA (µmol/l)** | 5.9 (0.9, 10.3) | 24.2 (12.3, 93.5)* | 0.04 |
| **Bilirubin (mg/dl)** | 0.6 ± 0.3 | 1.3 ± 0.9 | 0.07 |
| **GGT (U/l)** | 81 (35, 156) | 26 (21, 55) | 0.04 |
| **AP (U/l)** | 57 (48, 83) | 54 (50, 87) | 0.686 |

TBA, total bile acids; GGT, gamma-glutamyltransferase; AP, alkaline phosphatase

* For patient #1, TBA value at day 3 (before start of cholestyramine) was entered
